# Supplementary material for: Trabodenoson, an Adenosine Mimetic With A1 Receptor Selectivity Lowers Intraocular Pressure by Increasing Conventional Outflow Facility in Mice
Source: PubMed Central journal article supplement — Invest Ophthalmol Vis Sci. 2018 Jan;59(1):383–92. doi: 10.1167/iovs.17-23212 (PMC5774255; doi:10.1167/iovs.17-23212), 2018-01
Supplement: iovs-59-01-06_s01.pdf [file iovs-59-01-06_s01.pdf]

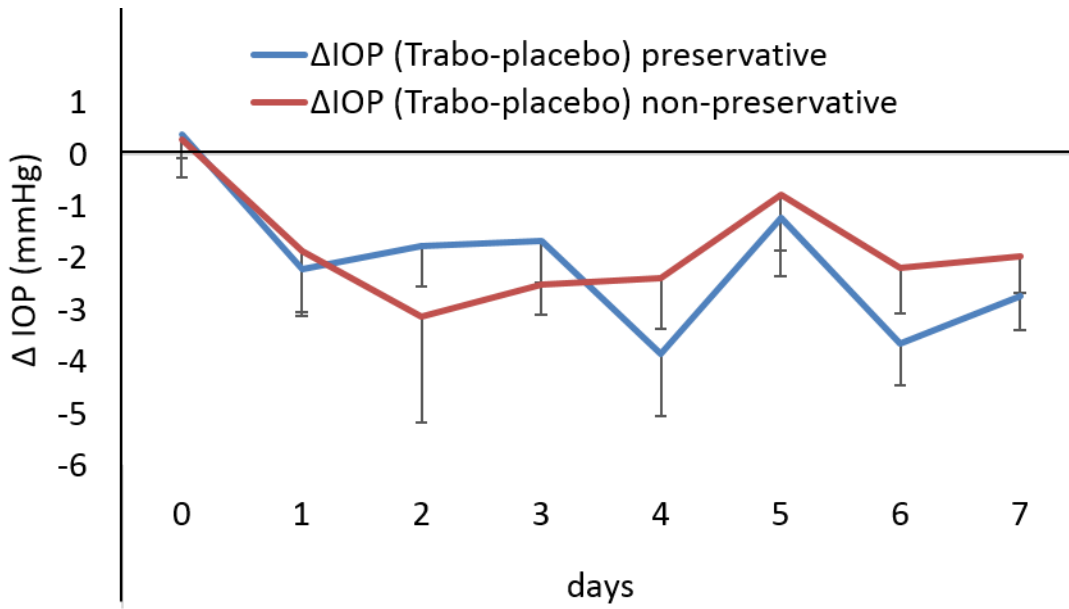

Supplemental Figure 1. Comparison of effects of trabodenoson with and without preservative on IOP of young mice. Two cohort mice were treated with either 6% trabodenoson with preservative on one eye (OD), placebo on the contralateral eye (OS) or 6% trabodenoson with preservative-free on one eye (OD) and placebo on the contralateral eye (OS) once/day for seven consecutive days. The data are displayed as change ( $\Delta$ ) in IOP between treated and contralateral eyes (N = 8 for both cohorts).
